# Supplementary material for: A Pressure-Pad-Embedded Treadmill Yields Time-Dependent Errors in Estimating Ground Reaction Force during Walking
Source: MDPI journal article supplement (doi:10.3390/s21165511), 2021-08-17
Supplement: s1 [file s1]

**Supplementary Table S1:** The equations of the curve-fitting model with respect to stride number and the corresponding coefficient of determination ( $R^2$ ) for each participant.

| Participant No. | Trial No. | 1 stride<br>$\Delta I_{fit} =$                  | 5 strides<br>$\Delta I_{fit} =$                 | 10 strides<br>$\Delta I_{fit} =$                | 15 strides<br>$\Delta I_{fit} =$                | 20 strides<br>$\Delta I_{fit} =$                |
|-----------------|-----------|-------------------------------------------------|-------------------------------------------------|-------------------------------------------------|-------------------------------------------------|-------------------------------------------------|
| 1               | 1         | $-311.77+253.10e^{-0.0023x}$ ,<br>$R^2 = 0.972$ | $-309.32+250.46e^{-0.0117x}$ ,<br>$R^2 = 0.988$ | $-309.71+249.29e^{-0.0234x}$ ,<br>$R^2 = 0.994$ | $-314.49+253.12e^{-0.0350x}$ ,<br>$R^2 = 0.993$ | $-314.24+251.43e^{-0.0467x}$ ,<br>$R^2 = 0.994$ |
|                 | 2         | $-324.84+131.38e^{-0.0022x}$ ,<br>$R^2 = 0.914$ | $-325.75+132.09e^{-0.0112x}$ ,<br>$R^2 = 0.972$ | $-327.87+133.67e^{-0.0222x}$ ,<br>$R^2 = 0.995$ | $-328.07+133.06e^{-0.0333x}$ ,<br>$R^2 = 0.986$ | $-328.59+132.88e^{-0.0441x}$ ,<br>$R^2 = 0.989$ |
| 2               | 1         | $-253.64+252.41e^{-0.0010x}$ ,<br>$R^2 = 0.972$ | $-235.06+251.57e^{-0.0051x}$ ,<br>$R^2 = 0.991$ | $-258.54+274.09e^{-0.0092x}$ ,<br>$R^2 = 0.994$ | $-263.00+277.89e^{-0.0135x}$ ,<br>$R^2 = 0.996$ | $-264.60+279.32e^{-0.0183x}$ ,<br>$R^2 = 0.996$ |
|                 | 2         | $-165.89+140.03e^{-0.0022x}$ ,<br>$R^2 = 0.972$ | $-169.88+143.57e^{-0.0103x}$ ,<br>$R^2 = 0.990$ | $-168.18+141.20e^{-0.0210x}$ ,<br>$R^2 = 0.994$ | $-167.68+139.91e^{-0.0316x}$ ,<br>$R^2 = 0.995$ | $-171.52+143.30e^{-0.0415x}$ ,<br>$R^2 = 0.997$ |
| 3               | 1         | $-143.49+146.89e^{-0.0022x}$ ,<br>$R^2 = 0.981$ | $-142.48+145.85e^{-0.0111x}$ ,<br>$R^2 = 0.991$ | $-142.57+145.09e^{-0.0221x}$ ,<br>$R^2 = 0.992$ | $-143.78+145.95e^{-0.0338x}$ ,<br>$R^2 = 0.992$ | $-148.23+149.41e^{-0.0431x}$ ,<br>$R^2 = 0.992$ |
|                 | 2         | $-159.78+137.24e^{-0.0024x}$ ,<br>$R^2 = 0.973$ | $-158.79+136.18e^{-0.0121x}$ ,<br>$R^2 = 0.987$ | $-159.47+136.27e^{-0.0243x}$ ,<br>$R^2 = 0.989$ | $-159.33+134.97e^{-0.0359x}$ ,<br>$R^2 = 0.990$ | $-163.72+139.09e^{-0.0478x}$ ,<br>$R^2 = 0.990$ |
| 4               | 1         | $-143.70+128.00e^{-0.0040x}$ ,<br>$R^2 = 0.826$ | $-154.40+139.46e^{-0.0168x}$ ,<br>$R^2 = 0.958$ | $-147.35+131.48e^{-0.0379x}$ ,<br>$R^2 = 0.965$ | $-154.83+137.49e^{-0.0516x}$ ,<br>$R^2 = 0.977$ | $-153.78+136.56e^{-0.0715x}$ ,<br>$R^2 = 0.979$ |
|                 | 2         | $-580.41+488.52e^{-0.0023x}$ ,<br>$R^2 = 0.716$ | $-579.63+484.42e^{-0.0037x}$ ,<br>$R^2 = 0.833$ | $-159.40+80.00e^{-0.0394x}$ ,<br>$R^2 = 0.921$  | $-163.74+82.39e^{-0.0535x}$ ,<br>$R^2 = 0.923$  | $-164.92+82.73e^{-0.0687x}$ ,<br>$R^2 = 0.934$  |
| 5               | 1         | $-244.58+163.18e^{-0.0032x}$ ,<br>$R^2 = 0.985$ | $-233.98+162.51e^{-0.0163x}$ ,<br>$R^2 = 0.993$ | $-224.53+161.60e^{-0.0324x}$ ,<br>$R^2 = 0.995$ | $-224.75+160.74e^{-0.0492x}$ ,<br>$R^2 = 0.996$ | $-226.13+161.06e^{-0.0656x}$ ,<br>$R^2 = 0.996$ |
|                 | 2         | $-281.61+132.63e^{-0.0022x}$ ,<br>$R^2 = 0.960$ | $-283.25+134.09e^{-0.0108x}$ ,<br>$R^2 = 0.988$ | $-286.05+136.21e^{-0.0211x}$ ,<br>$R^2 = 0.993$ | $-289.31+138.81e^{-0.0311x}$ ,<br>$R^2 = 0.995$ | $-289.82+138.81e^{-0.0418x}$ ,<br>$R^2 = 0.995$ |
| 6               | 1         | $-184.92+164.62e^{-0.0011x}$ ,<br>$R^2 = 0.953$ | $-206.22+185.54e^{-0.0048x}$ ,<br>$R^2 = 0.981$ | $-206.97+185.81e^{-0.0095x}$ ,<br>$R^2 = 0.987$ | $-196.71+175.25e^{-0.0153x}$ ,<br>$R^2 = 0.990$ | $-199.66+178.06e^{-0.0207x}$ ,<br>$R^2 = 0.994$ |
|                 | 2         | $-129.11+101.10e^{-0.0015x}$ ,<br>$R^2 = 0.946$ | $-132.96+104.71e^{-0.0069x}$ ,<br>$R^2 = 0.977$ | $-135.50+106.88e^{-0.0135x}$ ,<br>$R^2 = 0.984$ | $-138.40+109.34e^{-0.0195x}$ ,<br>$R^2 = 0.986$ | $-139.65+110.48e^{-0.0262x}$ ,<br>$R^2 = 0.988$ |
| 7               | 1         | $-187.10+167.38e^{-0.0024x}$ ,<br>$R^2 = 0.934$ | $-211.03+189.41e^{-0.0098x}$ ,<br>$R^2 = 0.975$ | $-212.00+189.71e^{-0.0197x}$ ,<br>$R^2 = 0.985$ | $-212.23+189.41e^{-0.0299x}$ ,<br>$R^2 = 0.987$ | $-217.05+193.38e^{-0.0391x}$ ,<br>$R^2 = 0.992$ |

|    |   |                                                 |                                                 |                                                 |                                                 |                                                 |
|----|---|-------------------------------------------------|-------------------------------------------------|-------------------------------------------------|-------------------------------------------------|-------------------------------------------------|
|    | 2 | $-129.11+133.99e^{-0.0022x}$ ,<br>$R^2 = 0.887$ | $-219.27+134.20e^{-0.0112x}$ ,<br>$R^2 = 0.961$ | $-217.75+132.32e^{-0.0231x}$ ,<br>$R^2 = 0.976$ | $-201.25+116.15e^{-0.0443x}$ ,<br>$R^2 = 0.954$ | $-221.25+134.53e^{-0.0439x}$ ,<br>$R^2 = 0.984$ |
| 8  | 1 | $-262.57+224.42e^{-0.0024x}$ ,<br>$R^2 = 0.966$ | $-261.35+223.18e^{-0.0123x}$ ,<br>$R^2 = 0.992$ | $-261.66+222.03e^{-0.0245x}$ ,<br>$R^2 = 0.994$ | $-260.89+219.91e^{-0.0369x}$ ,<br>$R^2 = 0.995$ | $-259.64+217.23e^{-0.0495x}$ ,<br>$R^2 = 0.995$ |
|    | 2 | $-295.23+177.88e^{-0.0024x}$ ,<br>$R^2 = 0.927$ | $-291.82+174.41e^{-0.0126x}$ ,<br>$R^2 = 0.978$ | $-293.21+175.00e^{-0.0254x}$ ,<br>$R^2 = 0.985$ | $-292.05+173.07e^{-0.0390x}$ ,<br>$R^2 = 0.989$ | $-291.01+171.29e^{-0.0534x}$ ,<br>$R^2 = 0.991$ |
| 9  | 1 | $-285.24+233.37e^{-0.0031x}$ ,<br>$R^2 = 0.964$ | $-286.44+233.90e^{-0.0154x}$ ,<br>$R^2 = 0.988$ | $-288.09+234.03e^{-0.0308x}$ ,<br>$R^2 = 0.992$ | $-287.93+232.07e^{-0.0462x}$ ,<br>$R^2 = 0.995$ | $-288.92+231.11e^{-0.0611x}$ ,<br>$R^2 = 0.995$ |
|    | 2 | $-297.26+138.77e^{-0.0034x}$ ,<br>$R^2 = 0.899$ | $-297.55+139.03e^{-0.0171x}$ ,<br>$R^2 = 0.967$ | $-297.61+137.84e^{-0.0342x}$ ,<br>$R^2 = 0.974$ | $-298.10+136.97e^{-0.0509x}$ ,<br>$R^2 = 0.978$ | $-297.46+135.32e^{-0.0686x}$ ,<br>$R^2 = 0.983$ |
| 10 | 1 | $-199.41+142.21e^{-0.0015x}$ ,<br>$R^2 = 0.969$ | $-195.44+138.45e^{-0.0079x}$ ,<br>$R^2 = 0.988$ | $-195.63+138.06e^{-0.0158x}$ ,<br>$R^2 = 0.992$ | $-196.82+138.86e^{-0.0238x}$ ,<br>$R^2 = 0.992$ | $-197.54+138.78e^{-0.0310x}$ ,<br>$R^2 = 0.992$ |
|    | 2 | $-200.56+96.41e^{-0.0015x}$ ,<br>$R^2 = 0.934$  | $-201.50+97.26e^{-0.0076x}$ ,<br>$R^2 = 0.969$  | $-202.13+97.52e^{-0.0151x}$ ,<br>$R^2 = 0.976$  | $-204.77+99.79e^{-0.0220x}$ ,<br>$R^2 = 0.985$  | $-192.68+87.56e^{-0.0345x}$ ,<br>$R^2 = 0.985$  |
| 11 | 1 | $-103.80+82.72e^{-0.0029x}$ ,<br>$R^2 = 0.978$  | $-103.82+82.76e^{-0.0145x}$ ,<br>$R^2 = 0.989$  | $-103.58+82.11e^{-0.0294x}$ ,<br>$R^2 = 0.992$  | $-104.06+82.14e^{-0.0443x}$ ,<br>$R^2 = 0.993$  | $-104.01+81.24e^{-0.0582}$ ,<br>$R^2 = 0.992$   |
|    | 2 | $-109.46+62.21e^{-0.0036x}$ ,<br>$R^2 = 0.961$  | $-109.46+62.09e^{-0.0181x}$ ,<br>$R^2 = 0.980$  | $-110.02+62.09e^{-0.0151x}$ ,<br>$R^2 = 0.985$  | $-110.81+62.32e^{-0.0530x}$ ,<br>$R^2 = 0.987$  | $-110.08+61.01e^{-0.0715x}$ ,<br>$R^2 = 0.988$  |
| 12 | 1 | $-172.30+111.15e^{-0.0030x}$ ,<br>$R^2 = 0.953$ | $-172.95+111.39e^{-0.0149x}$ ,<br>$R^2 = 0.969$ | $-174.06+111.77e^{-0.0299x}$ ,<br>$R^2 = 0.976$ | $-173.88+111.80e^{-0.0446x}$ ,<br>$R^2 = 0.981$ | $-177.08+113.24e^{-0.0575x}$ ,<br>$R^2 = 0.981$ |
|    | 2 | $-227.62+114.64e^{-0.0013x}$ ,<br>$R^2 = 0.917$ | $-223.77+110.97e^{-0.0070x}$ ,<br>$R^2 = 0.948$ | $-223.92+110.70e^{-0.0140x}$ ,<br>$R^2 = 0.956$ | $-225.14+111.45e^{-0.0207x}$ ,<br>$R^2 = 0.965$ | $-216.75+103.22e^{-0.0316x}$ ,<br>$R^2 = 0.960$ |
| 13 | 1 | $-245.96+224.26e^{-0.0031x}$ ,<br>$R^2 = 0.991$ | $-245.95+223.88e^{-0.0157x}$ ,<br>$R^2 = 0.996$ | $-248.16+224.53e^{-0.0313x}$ ,<br>$R^2 = 0.998$ | $-248.85+223.47e^{-0.0467x}$ ,<br>$R^2 = 0.998$ | $-249.47+222.15e^{-0.0618x}$ ,<br>$R^2 = 0.999$ |
|    | 2 | $-432.84+249.78e^{-0.0006x}$ ,<br>$R^2 = 0.889$ | $-434.65+251.49e^{-0.0028x}$ ,<br>$R^2 = 0.944$ | $-432.72+249.21e^{-0.0057x}$ ,<br>$R^2 = 0.955$ | $-457.83+274.09e^{-0.0079x}$ ,<br>$R^2 = 0.964$ | $-446.06+262.00e^{-0.0111x}$ ,<br>$R^2 = 0.961$ |
| 14 | 1 | $-131.73+109.16e^{-0.0027x}$ ,<br>$R^2 = 0.957$ | $-132.02+109.29e^{-0.0135x}$ ,<br>$R^2 = 0.981$ | $-133.24+109.86e^{-0.0269x}$ ,<br>$R^2 = 0.985$ | $-134.98+110.89e^{-0.0398x}$ ,<br>$R^2 = 0.986$ | $-132.98+108.18e^{-0.0540x}$ ,<br>$R^2 = 0.987$ |
|    | 2 | $-169.75+108.74e^{-0.0016x}$ ,<br>$R^2 = 0.859$ | $-170.03+108.92e^{-0.0081x}$ ,<br>$R^2 = 0.919$ | $-170.05+108.45e^{-0.0163x}$ ,<br>$R^2 = 0.936$ | $-186.28+123.97e^{-0.0204x}$ ,<br>$R^2 = 0.951$ | $-171.97+109.39e^{-0.0317x}$ ,<br>$R^2 = 0.949$ |
| 15 | 1 | $-259.10+203.79e^{-0.0017x}$ ,<br>$R^2 = 0.976$ | $-258.98+203.46e^{-0.0083x}$ ,<br>$R^2 = 0.990$ | $-259.70+203.26e^{-0.0166x}$ ,<br>$R^2 = 0.993$ | $-265.85+208.95e^{-0.0244x}$ ,<br>$R^2 = 0.994$ | $-259.80+201.66e^{-0.0331x}$ ,<br>$R^2 = 0.994$ |

|    |   |                                                 |                                                 |                                                 |                                                 |                                                 |
|----|---|-------------------------------------------------|-------------------------------------------------|-------------------------------------------------|-------------------------------------------------|-------------------------------------------------|
|    | 2 | $-289.08+161.02e^{-0.0015x}$ ,<br>$R^2 = 0.949$ | $-285.80+157.73e^{-0.0078x}$ ,<br>$R^2 = 0.978$ | $-285.50+156.81e^{-0.0155x}$ ,<br>$R^2 = 0.981$ | $-290.48+161.35e^{-0.0228x}$ ,<br>$R^2 = 0.983$ | $-282.92+152.97e^{-0.0317x}$ ,<br>$R^2 = 0.985$ |
| 16 | 1 | $-236.45+201.25e^{-0.0017x}$ ,<br>$R^2 = 0.976$ | $-233.37+198.38e^{-0.0090x}$ ,<br>$R^2 = 0.986$ | $-233.33+197.39e^{-0.0180x}$ ,<br>$R^2 = 0.991$ | $-234.07+197.15e^{-0.0268x}$ ,<br>$R^2 = 0.991$ | $-234.89+197.03e^{-0.0355x}$ ,<br>$R^2 = 0.995$ |
|    | 2 | $-291.22+194.08e^{-0.0016x}$ ,<br>$R^2 = 0.968$ | $-291.84+194.50e^{-0.0081x}$ ,<br>$R^2 = 0.987$ | $-295.53+197.50e^{-0.0161x}$ ,<br>$R^2 = 0.990$ | $-297.53+198.59e^{-0.0238x}$ ,<br>$R^2 = 0.992$ | $-296.15+196.47e^{-0.0320x}$ ,<br>$R^2 = 0.992$ |
| 17 | 1 | $-156.09+111.10e^{-0.0021x}$ ,<br>$R^2 = 0.935$ | $-151.59+106.63e^{-0.0112x}$ ,<br>$R^2 = 0.977$ | $-151.69+106.36e^{-0.0227x}$ ,<br>$R^2 = 0.986$ | $-150.74+104.69e^{-0.0341x}$ ,<br>$R^2 = 0.991$ | $-152.40+105.75e^{-0.0448x}$ ,<br>$R^2 = 0.991$ |
|    | 2 | $-161.97+77.34e^{-0.0031x}$ ,<br>$R^2 = 0.807$  | $-160.48+75.88e^{-0.0158x}$ ,<br>$R^2 = 0.939$  | $-159.12+74.12e^{-0.0327x}$ ,<br>$R^2 = 0.965$  | $-156.90+71.85e^{-0.0528x}$ ,<br>$R^2 = 0.974$  | $-155.36+69.59e^{-0.0720x}$ ,<br>$R^2 = 0.983$  |
| 18 | 1 | $-286.66+253.12e^{-0.0021x}$ ,<br>$R^2 = 0.844$ | $-287.30+253.91e^{-0.0107x}$ ,<br>$R^2 = 0.956$ | $-295.19+259.71e^{-0.0204x}$ ,<br>$R^2 = 0.979$ | $-299.29+262.74e^{-0.0304x}$ ,<br>$R^2 = 0.979$ | $-298.84+260.28e^{-0.0399x}$ ,<br>$R^2 = 0.987$ |
|    | 2 | $-267.26+126.48e^{-0.0030x}$ ,<br>$R^2 = 0.572$ | $-264.16+123.64e^{-0.0155x}$ ,<br>$R^2 = 0.836$ | $-266.30+124.45e^{-0.0302x}$ ,<br>$R^2 = 0.893$ | $-273.51+130.27e^{-0.0417x}$ ,<br>$R^2 = 0.942$ | $-267.48+123.39e^{-0.0590x}$ ,<br>$R^2 = 0.934$ |
| 19 | 1 | $-150.55+96.68e^{-0.0029x}$ ,<br>$R^2 = 0.957$  | $-150.61+96.17e^{-0.0141x}$ ,<br>$R^2 = 0.988$  | $-151.35+96.34e^{-0.0281x}$ ,<br>$R^2 = 0.994$  | $-151.37+96.07e^{-0.0431x}$ ,<br>$R^2 = 0.988$  | $-154.87+99.20e^{-0.0564x}$ ,<br>$R^2 = 0.994$  |
|    | 2 | $-165.83+67.23e^{-0.0025x}$ ,<br>$R^2 = 0.969$  | $-165.00+66.47e^{-0.0128x}$ ,<br>$R^2 = 0.984$  | $-164.47+65.56e^{-0.0260x}$ ,<br>$R^2 = 0.990$  | $-166.84+67.61e^{-0.0379x}$ ,<br>$R^2 = 0.992$  | $-170.49+70.70e^{-0.0470x}$ ,<br>$R^2 = 0.995$  |
| 20 | 1 | $-149.35+84.84e^{-0.0028x}$ ,<br>$R^2 = 0.889$  | $-149.61+84.92e^{-0.0141x}$ ,<br>$R^2 = 0.967$  | $-151.41+85.98e^{-0.0273x}$ ,<br>$R^2 = 0.982$  | $-151.12+85.16e^{-0.0412x}$ ,<br>$R^2 = 0.987$  | $-155.15+88.55e^{-0.0518x}$ ,<br>$R^2 = 0.989$  |
|    | 2 | $-167.36+70.75e^{-0.0024x}$ ,<br>$R^2 = 0.738$  | $-166.49+69.87e^{-0.0123x}$ ,<br>$R^2 = 0.892$  | $-167.38+70.31e^{-0.0243x}$ ,<br>$R^2 = 0.921$  | $-167.14+69.71e^{-0.0367x}$ ,<br>$R^2 = 0.933$  | $-167.23+69.54e^{-0.0500x}$ ,<br>$R^2 = 0.951$  |

**Supplementary Table S2:** The equations of the curve-fitting model with respect to time and the corresponding coefficient of determination ( $R^2$ ) for each participant.

| Participant No. | Trial No. | 5 seconds<br>$\Delta I_{fit} =$                 | 10 seconds<br>$\Delta I_{fit} =$                | 15 seconds<br>$\Delta I_{fit} =$                 | 20 seconds<br>$\Delta I_{fit} =$                |
|-----------------|-----------|-------------------------------------------------|-------------------------------------------------|--------------------------------------------------|-------------------------------------------------|
| 1               | 1         | $-305.68+247.24e^{-0.0100x}$ ,<br>$R^2 = 0.986$ | $-307.80+247.79e^{-0.0197x}$ ,<br>$R^2 = 0.992$ | $-308.73+247.38e^{-0.0294x}$ ,<br>$R^2 = 0.994$  | $-309.31+246.73e^{-0.0390x}$ ,<br>$R^2 = 0.995$ |
|                 | 2         | $-323.62+129.81e^{-0.0094x}$ ,<br>$R^2 = 0.966$ | $-323.34+129.12e^{-0.0198x}$ ,<br>$R^2 = 0.980$ | $-323.81+128.93e^{-0.0282x}$ ,<br>$R^2 = 0.986$  | $-323.59+128.22e^{-0.0378x}$ ,<br>$R^2 = 0.991$ |
| 2               | 1         | $-227.93+244.82e^{-0.0048x}$ ,<br>$R^2 = 0.992$ | $-228.93+245.01e^{-0.0095x}$ ,<br>$R^2 = 0.995$ | $-229.15+244.58e^{-0.0142x}$ ,<br>$R^2 = 0.996$  | $-231.66+246.47e^{-0.0187x}$ ,<br>$R^2 = 0.996$ |
|                 | 2         | $-163.75+137.85e^{-0.0099x}$ ,<br>$R^2 = 0.989$ | $-164.06+137.33e^{-0.0198x}$ ,<br>$R^2 = 0.995$ | $-164.68+137.24e^{-0.02985x}$ ,<br>$R^2 = 0.996$ | $-165.22+136.97e^{-0.0390x}$ ,<br>$R^2 = 0.997$ |
| 3               | 1         | $-144.26+147.42e^{-0.0091x}$ ,<br>$R^2 = 0.988$ | $-143.80+146.26e^{-0.0183x}$ ,<br>$R^2 = 0.991$ | $-144.20+145.98e^{-0.0274x}$ ,<br>$R^2 = 0.991$  | $-143.46+144.66e^{-0.0368x}$ ,<br>$R^2 = 0.993$ |
|                 | 2         | $-158.21+135.99e^{-0.0104x}$ ,<br>$R^2 = 0.984$ | $-158.15+135.12e^{-0.0208x}$ ,<br>$R^2 = 0.987$ | $-158.37+134.59e^{-0.0310x}$ ,<br>$R^2 = 0.989$  | $-158.73+134.21e^{-0.0412x}$ ,<br>$R^2 = 0.989$ |
| 4               | 1         | $-135.04+120.92e^{-0.0192x}$ ,<br>$R^2 = 0.820$ | $-166.27+149.27e^{-0.0229x}$ ,<br>$R^2 = 0.965$ | $-152.64+136.59e^{-0.0424x}$ ,<br>$R^2 = 0.955$  | $-158.26+140.78e^{-0.0516x}$ ,<br>$R^2 = 0.970$ |
|                 | 2         | $-541.01+447.32e^{-0.0060x}$ ,<br>$R^2 = 0.738$ | $-165.27+84.32e^{-0.0274x}$ ,<br>$R^2 = 0.898$  | $-163.02+81.83e^{-0.0433x}$ ,<br>$R^2 = 0.905$   | $-158.36+76.92e^{-0.0646x}$ ,<br>$R^2 = 0.903$  |
| 5               | 1         | $-223.76+163.60e^{-0.0127x}$ ,<br>$R^2 = 0.991$ | $-224.05+162.79e^{-0.0254x}$ ,<br>$R^2 = 0.994$ | $-224.79+162.21e^{-0.0377x}$ ,<br>$R^2 = 0.996$  | $-225.44+161.57e^{-0.0498x}$ ,<br>$R^2 = 0.996$ |
|                 | 2         | $-278.24+129.86e^{-0.0090x}$ ,<br>$R^2 = 0.981$ | $-278.91+129.75e^{-0.0178x}$ ,<br>$R^2 = 0.988$ | $-278.25+128.50e^{-0.0269x}$ ,<br>$R^2 = 0.991$  | $-280.82+129.59e^{-0.0350x}$ ,<br>$R^2 = 0.993$ |
| 6               | 1         | $-173.55+153.15e^{-0.0055x}$ ,<br>$R^2 = 0.973$ | $-179.71+158.71e^{-0.0104x}$ ,<br>$R^2 = 0.985$ | $-180.16+158.76e^{-0.0155x}$ ,<br>$R^2 = 0.987$  | $-179.01+157.17e^{-0.0208x}$ ,<br>$R^2 = 0.989$ |
|                 | 2         | $-116.75+84.97e^{-0.0004x}$ ,<br>$R^2 = 0.965$  | $-128.27+99.90e^{-0.0133x}$ ,<br>$R^2 = 0.983$  | $-127.15+98.51e^{-0.0203x}$ ,<br>$R^2 = 0.985$   | $-127.40+98.45e^{-0.0269x}$ ,<br>$R^2 = 0.986$  |
| 7               | 1         | $-210.48+189.22e^{-0.0078x}$ ,<br>$R^2 = 0.969$ | $-204.80+182.66e^{-0.0161x}$ ,<br>$R^2 = 0.983$ | $-210.34+187.52e^{-0.0233x}$ ,<br>$R^2 = 0.985$  | $-208.26+184.91e^{-0.0316x}$ ,<br>$R^2 = 0.989$ |

|    |   |                                                 |                                                 |                                                 |                                                 |
|----|---|-------------------------------------------------|-------------------------------------------------|-------------------------------------------------|-------------------------------------------------|
|    | 2 | $-214.85+130.65e^{-0.0097x}$ ,<br>$R^2 = 0.946$ | $-218.23+132.85e^{-0.0184x}$ ,<br>$R^2 = 0.963$ | $-225.49+139.29e^{-0.0253x}$ ,<br>$R^2 = 0.972$ | $-219.38+132.39e^{-0.0363x}$ ,<br>$R^2 = 0.975$ |
| 8  | 1 | $-254.59+216.35e^{-0.0103x}$ ,<br>$R^2 = 0.990$ | $-254.97+215.55e^{-0.0206x}$ ,<br>$R^2 = 0.994$ | $-256.75+215.76e^{-0.0304x}$ ,<br>$R^2 = 0.995$ | $-257.34+215.24e^{-0.0403x}$ ,<br>$R^2 = 0.996$ |
|    | 2 | $-291.61+173.74e^{-0.0099x}$ ,<br>$R^2 = 0.970$ | $-302.57+183.75e^{-0.0182x}$ ,<br>$R^2 = 0.983$ | $-291.20+171.71e^{-0.0297x}$ ,<br>$R^2 = 0.984$ | $-291.22+170.78e^{-0.0395x}$ ,<br>$R^2 = 0.986$ |
| 9  | 1 | $-282.82+231.39e^{-0.0130x}$ ,<br>$R^2 = 0.985$ | $-282.48+229.50e^{-0.0261x}$ ,<br>$R^2 = 0.992$ | $-283.63+228.98e^{-0.0388x}$ ,<br>$R^2 = 0.995$ | $-283.85+227.58e^{-0.0517x}$ ,<br>$R^2 = 0.995$ |
|    | 2 | $-295.40+137.60e^{-0.0142x}$ ,<br>$R^2 = 0.949$ | $-297.02+137.72e^{-0.0277x}$ ,<br>$R^2 = 0.970$ | $-296.51+136.33e^{-0.0419x}$ ,<br>$R^2 = 0.972$ | $-297.67+136.16e^{-0.0548x}$ ,<br>$R^2 = 0.979$ |
| 10 | 1 | $-193.61+137.06e^{-0.0070x}$ ,<br>$R^2 = 0.984$ | $-194.50+137.34e^{-0.0140x}$ ,<br>$R^2 = 0.988$ | $-195.62+137.89e^{-0.0207x}$ ,<br>$R^2 = 0.981$ | $-196.69+138.38e^{-0.0272x}$ ,<br>$R^2 = 0.991$ |
|    | 2 | $-196.03+91.93e^{-0.0071x}$ ,<br>$R^2 = 0.968$  | $-194.80+90.44e^{-0.0145x}$ ,<br>$R^2 = 0.978$  | $-196.39+91.64e^{-0.0213x}$ ,<br>$R^2 = 0.985$  | $-195.66+90.61e^{-0.0287x}$ ,<br>$R^2 = 0.985$  |
| 11 | 1 | $-102.78+81.56e^{-0.0131x}$ ,<br>$R^2 = 0.987$  | $-102.96+81.15e^{-0.0261x}$ ,<br>$R^2 = 0.989$  | $-102.71+80.38e^{-0.0394x}$ ,<br>$R^2 = 0.990$  | $-103.01+80.09e^{-0.0522}$ ,<br>$R^2 = 0.991$   |
|    | 2 | $-108.24+61.37e^{-0.0168x}$ ,<br>$R^2 = 0.980$  | $-108.53+60.94e^{-0.0331x}$ ,<br>$R^2 = 0.985$  | $-108.85+60.60e^{-0.0491x}$ ,<br>$R^2 = 0.987$  | $-108.75+60.04e^{-0.0656x}$ ,<br>$R^2 = 0.988$  |
| 12 | 1 | $-171.89+110.51e^{-0.0139x}$ ,<br>$R^2 = 0.969$ | $-175.38+112.95e^{-0.0266x}$ ,<br>$R^2 = 0.979$ | $-171.43+108.66e^{-0.0423x}$ ,<br>$R^2 = 0.979$ | $-172.10+108.35e^{-0.0555x}$ ,<br>$R^2 = 0.981$ |
|    | 2 | $-224.14+111.31e^{-0.0063x}$ ,<br>$R^2 = 0.945$ | $-205.74+93.21e^{-0.0166x}$ ,<br>$R^2 = 0.971$  | $-225.07+111.44e^{-0.0187x}$ ,<br>$R^2 = 0.962$ | $-227.47+113.31e^{-0.0241x}$ ,<br>$R^2 = 0.959$ |
| 13 | 1 | $-245.30+224.16e^{-0.0130x}$ ,<br>$R^2 = 0.995$ | $-245.85+222.95e^{-0.0259x}$ ,<br>$R^2 = 0.997$ | $-245.62+221.42e^{-0.0390x}$ ,<br>$R^2 = 0.997$ | $-246.44+220.52e^{-0.0515x}$ ,<br>$R^2 = 0.998$ |
|    | 2 | $-422.36+239.36e^{-0.0025x}$ ,<br>$R^2 = 0.926$ | $-435.50+252.20e^{-0.0047x}$ ,<br>$R^2 = 0.948$ | $-443.76+260.03e^{-0.0068x}$ ,<br>$R^2 = 0.955$ | $-447.18+263.20e^{-0.0090x}$ ,<br>$R^2 = 0.960$ |
| 14 | 1 | $-131.29+109.16e^{-0.0122x}$ ,<br>$R^2 = 0.979$ | $-132.38+109.28e^{-0.0240x}$ ,<br>$R^2 = 0.985$ | $-132.02+108.25e^{-0.0362x}$ ,<br>$R^2 = 0.989$ | $-132.39+108.02e^{-0.0480x}$ ,<br>$R^2 = 0.989$ |
|    | 2 | $-171.02+110.18e^{-0.0071x}$ ,<br>$R^2 = 0.903$ | $-149.41+89.35e^{-0.0204x}$ ,<br>$R^2 = 0.961$  | $-172.76+110.87e^{-0.0206x}$ ,<br>$R^2 = 0.939$ | $-171.38+109.11e^{-0.0279x}$ ,<br>$R^2 = 0.947$ |
| 15 | 1 | $-256.80+202.39e^{-0.0080x}$ ,<br>$R^2 = 0.990$ | $-258.31+202.82e^{-0.0158x}$ ,<br>$R^2 = 0.993$ | $-259.40+202.96e^{-0.0235x}$ ,<br>$R^2 = 0.994$ | $-259.20+202.06e^{-0.0314x}$ ,<br>$R^2 = 0.996$ |

|    |   |                                                |                                                |                                                |                                                |
|----|---|------------------------------------------------|------------------------------------------------|------------------------------------------------|------------------------------------------------|
|    | 2 | $-286.76+158.53e^{-0.0072x},$<br>$R^2 = 0.977$ | $-287.01+158.13e^{-0.0144x},$<br>$R^2 = 0.988$ | $-284.59+155.25e^{-0.0220x},$<br>$R^2 = 0.986$ | $-285.14+155.26e^{-0.0292x},$<br>$R^2 = 0.987$ |
| 16 | 1 | $-231.64+196.66e^{-0.0073x},$<br>$R^2 = 0.978$ | $-231.58+195.88e^{-0.0146x},$<br>$R^2 = 0.983$ | $-232.65+196.07e^{-0.0217x},$<br>$R^2 = 0.987$ | $-231.46+194.21e^{-0.0293x},$<br>$R^2 = 0.990$ |
|    | 2 | $-279.59+183.05e^{-0.0073x},$<br>$R^2 = 0.982$ | $-279.74+182.48e^{-0.0146x},$<br>$R^2 = 0.988$ | $-279.94+181.99e^{-0.0218x},$<br>$R^2 = 0.989$ | $-283.57+184.56e^{-0.0282x},$<br>$R^2 = 0.991$ |
| 17 | 1 | $-151.69+106.77e^{-0.0106x},$<br>$R^2 = 0.974$ | $-151.63+106.18e^{-0.0213x},$<br>$R^2 = 0.986$ | $-151.41+105.37e^{-0.0320x},$<br>$R^2 = 0.993$ | $-151.58+105.00e^{-0.0426x},$<br>$R^2 = 0.994$ |
|    | 2 | $-162.71+77.82e^{-0.0141x},$<br>$R^2 = 0.934$  | $-164.07+78.49e^{-0.0274x},$<br>$R^2 = 0.958$  | $-163.87+77.80e^{-0.0414x},$<br>$R^2 = 0.966$  | $-163.88+77.19e^{-0.0550x},$<br>$R^2 = 0.975$  |
| 18 | 1 | $-286.07+253.92e^{-0.0095x},$<br>$R^2 = 0.952$ | $-285.00+251.54e^{-0.0191x},$<br>$R^2 = 0.967$ | $-287.50+252.27e^{-0.0281x},$<br>$R^2 = 0.981$ | $-290.92+254.15e^{-0.0367x},$<br>$R^2 = 0.978$ |
|    | 2 | $-264.28+124.35e^{-0.0140x},$<br>$R^2 = 0.833$ | $-264.75+123.98e^{-0.0279x},$<br>$R^2 = 0.895$ | $-265.00+122.96e^{-0.0414x},$<br>$R^2 = 0.933$ | $-266.63+123.30e^{-0.0538x},$<br>$R^2 = 0.957$ |
| 19 | 1 | $-148.77+94.69e^{-0.0124x},$<br>$R^2 = 0.987$  | $-148.18+93.44e^{-0.0249x},$<br>$R^2 = 0.991$  | $-149.10+93.78e^{-0.0370x},$<br>$R^2 = 0.994$  | $-150.07+94.26e^{-0.0488x},$<br>$R^2 = 0.995$  |
|    | 2 | $-164.93+66.85e^{-0.0109x},$<br>$R^2 = 0.976$  | $-164.08+65.60e^{-0.0222x},$<br>$R^2 = 0.979$  | $-165.77+66.92e^{-0.0322x},$<br>$R^2 = 0.987$  | $-165.37+66.04e^{-0.0430x},$<br>$R^2 = 0.989$  |
| 20 | 1 | $-149.07+84.77e^{-0.0131x},$<br>$R^2 = 0.960$  | $-149.36+84.44e^{-0.0259x},$<br>$R^2 = 0.976$  | $-149.20+83.73e^{-0.0390x},$<br>$R^2 = 0.983$  | $-149.40+83.36e^{-0.0518x},$<br>$R^2 = 0.985$  |
|    | 2 | $-165.20+68.90e^{-0.0117x},$<br>$R^2 = 0.872$  | $-165.96+68.93e^{-0.0229x},$<br>$R^2 = 0.907$  | $-165.59+68.29e^{-0.0347x},$<br>$R^2 = 0.933$  | $-165.24+67.54e^{-0.0466x},$<br>$R^2 = 0.938$  |

**Supplementary Table S3:** The equations of the curve-fitting model with respect to distance and the corresponding coefficient of determination ( $R^2$ ) for each participant.

| Participant No. | Trial No. | 5 meters<br>$\Delta I_{fit} =$                  | 10 meters<br>$\Delta I_{fit} =$                 | 15 meters<br>$\Delta I_{fit} =$                 | 20 meters<br>$\Delta I_{fit} =$                 |
|-----------------|-----------|-------------------------------------------------|-------------------------------------------------|-------------------------------------------------|-------------------------------------------------|
| 1               | 1         | $-304.75+246.76e^{-0.0089x}$ ,<br>$R^2 = 0.988$ | $-304.40+245.26e^{-0.0178x}$ ,<br>$R^2 = 0.990$ | $-309.03+248.95e^{-0.0264x}$ ,<br>$R^2 = 0.992$ | $-307.27+245.51e^{-0.0349x}$ ,<br>$R^2 = 0.993$ |
|                 | 2         | $-325.58+132.11e^{-0.0082x}$ ,<br>$R^2 = 0.964$ | $-326.39+132.67e^{-0.0164x}$ ,<br>$R^2 = 0.980$ | $-327.84+133.40e^{-0.0242x}$ ,<br>$R^2 = 0.985$ | $-325.71+131.37e^{-0.0340x}$ ,<br>$R^2 = 0.988$ |
| 2               | 1         | $-229.31+246.38e^{-0.0041x}$ ,<br>$R^2 = 0.990$ | $-242.03+258.52e^{-0.0078x}$ ,<br>$R^2 = 0.993$ | $-231.09+247.00e^{-0.0122x}$ ,<br>$R^2 = 0.994$ | $-245.84+261.18e^{-0.0153x}$ ,<br>$R^2 = 0.996$ |
|                 | 2         | $-168.30+142.38e^{-0.0082x}$ ,<br>$R^2 = 0.990$ | $-169.12+142.77e^{-0.0164x}$ ,<br>$R^2 = 0.994$ | $-168.44+141.30e^{-0.0245x}$ ,<br>$R^2 = 0.996$ | $-169.78+142.10e^{-0.0324x}$ ,<br>$R^2 = 0.996$ |
| 3               | 1         | $-143.12+146.48e^{-0.0108x}$ ,<br>$R^2 = 0.993$ | $-143.91+146.63e^{-0.0218x}$ ,<br>$R^2 = 0.992$ | $-143.72+145.42e^{-0.0323x}$ ,<br>$R^2 = 0.995$ | $-151.18+152.52e^{-0.0418x}$ ,<br>$R^2 = 0.994$ |
|                 | 2         | $-158.01+135.97e^{-0.0122x}$ ,<br>$R^2 = 0.990$ | $-158.99+136.28e^{-0.0245x}$ ,<br>$R^2 = 0.992$ | $-158.78+134.88e^{-0.0363x}$ ,<br>$R^2 = 0.993$ | $-163.45+139.22e^{-0.0481x}$ ,<br>$R^2 = 0.993$ |
| 4               | 1         | $-143.51+129.30e^{-0.0166x}$ ,<br>$R^2 = 0.889$ | $-150.16+136.38e^{-0.0306x}$ ,<br>$R^2 = 0.968$ | $-148.64+132.85e^{-0.0458x}$ ,<br>$R^2 = 0.976$ | $-152.84+136.59e^{-0.0584x}$ ,<br>$R^2 = 0.980$ |
|                 | 2         | $-568.05+476.58e^{-0.0059x}$ ,<br>$R^2 = 0.881$ | $-160.48+81.13e^{-0.0341x}$ ,<br>$R^2 = 0.905$  | $-159.01+78.65e^{-0.0498x}$ ,<br>$R^2 = 0.937$  | $-163.11+81.71e^{-0.0631x}$ ,<br>$R^2 = 0.932$  |
| 5               | 1         | $-224.98+165.00e^{-0.0131x}$ ,<br>$R^2 = 0.993$ | $-224.49+163.82e^{-0.0268x}$ ,<br>$R^2 = 0.995$ | $-225.17+163.15e^{-0.0395x}$ ,<br>$R^2 = 0.996$ | $-226.11+162.90e^{-0.0527x}$ ,<br>$R^2 = 0.997$ |
|                 | 2         | $-277.42+129.27e^{-0.0094x}$ ,<br>$R^2 = 0.986$ | $-279.11+130.45e^{-0.0187x}$ ,<br>$R^2 = 0.991$ | $-286.66+136.66e^{-0.0259x}$ ,<br>$R^2 = 0.995$ | $-289.42+138.89e^{-0.0338x}$ ,<br>$R^2 = 0.996$ |
| 6               | 1         | $-201.49+180.64e^{-0.0039x}$ ,<br>$R^2 = 0.982$ | $-197.09+175.77e^{-0.0081x}$ ,<br>$R^2 = 0.986$ | $-207.59+186.14e^{-0.0116x}$ ,<br>$R^2 = 0.991$ | $-198.68+176.78e^{-0.0160x}$ ,<br>$R^2 = 0.991$ |
|                 | 2         | $-404.48+370.27e^{-0.0011x}$ ,<br>$R^2 = 0.960$ | $-123.74+95.79e^{-0.0126x}$ ,<br>$R^2 = 0.981$  | $-128.10+100.15e^{-0.0182x}$ ,<br>$R^2 = 0.989$ | $-124.65+95.17e^{-0.0249x}$ ,<br>$R^2 = 0.987$  |
| 7               | 1         | $-206.66+185.78e^{-0.0076x}$ ,<br>$R^2 = 0.969$ | $-203.82+182.90e^{-0.0160x}$ ,<br>$R^2 = 0.981$ | $-192.99+172.23e^{-0.0263x}$ ,<br>$R^2 = 0.989$ | $-193.65+172.55e^{-0.0359x}$ ,<br>$R^2 = 0.986$ |

|    |   |                                                 |                                                 |                                                 |                                                 |
|----|---|-------------------------------------------------|-------------------------------------------------|-------------------------------------------------|-------------------------------------------------|
|    | 2 | $-216.27+132.23e^{-0.0092x}$ ,<br>$R^2 = 0.949$ | $-218.49+135.28e^{-0.0187x}$ ,<br>$R^2 = 0.966$ | $-218.45+133.12e^{-0.0284x}$ ,<br>$R^2 = 0.978$ | $-210.79+125.72e^{-0.0419x}$ ,<br>$R^2 = 0.979$ |
| 8  | 1 | $-251.36+213.87e^{-0.0097x}$ ,<br>$R^2 = 0.989$ | $-255.97+216.00e^{-0.0186x}$ ,<br>$R^2 = 0.991$ | $-259.06+218.47e^{-0.0274x}$ ,<br>$R^2 = 0.993$ | $-254.91+215.09e^{-0.0390x}$ ,<br>$R^2 = 0.992$ |
|    | 2 | $-294.08+176.06e^{-0.0088x}$ ,<br>$R^2 = 0.969$ | $-298.72+179.91e^{-0.0171x}$ ,<br>$R^2 = 0.978$ | $-289.54+170.23e^{-0.0277x}$ ,<br>$R^2 = 0.982$ | $-295.95+175.66e^{-0.0355x}$ ,<br>$R^2 = 0.984$ |
| 9  | 1 | $-284.17+232.57e^{-0.0132x}$ ,<br>$R^2 = 0.986$ | $-288.51+235.06e^{-0.0261x}$ ,<br>$R^2 = 0.994$ | $-288.55+233.80e^{-0.0394x}$ ,<br>$R^2 = 0.995$ | $-292.09+234.98e^{-0.0516x}$ ,<br>$R^2 = 0.996$ |
|    | 2 | $-298.53+140.62e^{-0.0140x}$ ,<br>$R^2 = 0.959$ | $-297.05+138.07e^{-0.0294x}$ ,<br>$R^2 = 0.976$ | $-296.01+136.71e^{-0.0453x}$ ,<br>$R^2 = 0.981$ | $-301.45+139.08e^{-0.0569x}$ ,<br>$R^2 = 0.987$ |
| 10 | 1 | $-190.73+134.19e^{-0.0070x}$ ,<br>$R^2 = 0.989$ | $-190.86+133.85e^{-0.0141x}$ ,<br>$R^2 = 0.992$ | $-197.97+140.09e^{-0.0194x}$ ,<br>$R^2 = 0.993$ | $-199.32+141.22e^{-0.0263x}$ ,<br>$R^2 = 0.996$ |
|    | 2 | $-198.05+93.99e^{-0.0070x}$ ,<br>$R^2 = 0.979$  | $-198.95+94.66e^{-0.0133x}$ ,<br>$R^2 = 0.987$  | $-200.46+95.87e^{-0.0193x}$ ,<br>$R^2 = 0.991$  | $-195.24+90.45e^{-0.0284x}$ ,<br>$R^2 = 0.992$  |
| 11 | 1 | $-103.68+82.57e^{-0.0115x}$ ,<br>$R^2 = 0.989$  | $-102.54+81.06e^{-0.0236x}$ ,<br>$R^2 = 0.990$  | $-104.36+82.34e^{-0.0346x}$ ,<br>$R^2 = 0.994$  | $-102.65+80.10e^{-0.0469}$ ,<br>$R^2 = 0.992$   |
|    | 2 | $-109.67+62.79e^{-0.0143x}$ ,<br>$R^2 = 0.982$  | $-109.93+62.32e^{-0.0286x}$ ,<br>$R^2 = 0.984$  | $-110.29+62.54e^{-0.0430x}$ ,<br>$R^2 = 0.991$  | $-110.37+61.94e^{-0.0580x}$ ,<br>$R^2 = 0.988$  |
| 12 | 1 | $-172.64+111.48e^{-0.0129x}$ ,<br>$R^2 = 0.972$ | $-173.90+111.79e^{-0.0252x}$ ,<br>$R^2 = 0.975$ | $-175.37+111.59e^{-0.0366x}$ ,<br>$R^2 = 0.979$ | $-173.49+109.70e^{-0.0507x}$ ,<br>$R^2 = 0.980$ |
|    | 2 | $-220.50+107.83e^{-0.0061x}$ ,<br>$R^2 = 0.950$ | $-214.89+102.52e^{-0.0134x}$ ,<br>$R^2 = 0.957$ | $-217.46+104.01e^{-0.0193x}$ ,<br>$R^2 = 0.963$ | $-217.58+103.68e^{-0.0253x}$ ,<br>$R^2 = 0.959$ |
| 13 | 1 | $-246.98+226.23e^{-0.0130x}$ ,<br>$R^2 = 0.996$ | $-246.87+225.20e^{-0.0265x}$ ,<br>$R^2 = 0.997$ | $-252.08+228.53e^{-0.0385x}$ ,<br>$R^2 = 0.998$ | $-252.23+227.71e^{-0.0519x}$ ,<br>$R^2 = 0.998$ |
|    | 2 | $-420.69+237.88e^{-0.0026x}$ ,<br>$R^2 = 0.941$ | $-417.23+234.27e^{-0.0053x}$ ,<br>$R^2 = 0.948$ | $-439.13+255.56e^{-0.0073x}$ ,<br>$R^2 = 0.957$ | $-410.46+226.37e^{-0.0046x}$ ,<br>$R^2 = 0.961$ |
| 14 | 1 | $-135.79+113.12e^{-0.0101x}$ ,<br>$R^2 = 0.977$ | $-137.61+114.13e^{-0.0199x}$ ,<br>$R^2 = 0.984$ | $-136.71+113.24e^{-0.0309x}$ ,<br>$R^2 = 0.987$ | $-137.36+112.55e^{-0.0398x}$ ,<br>$R^2 = 0.988$ |
|    | 2 | $-161.81+101.56e^{-0.0072x}$ ,<br>$R^2 = 0.908$ | $-176.62+115.19e^{-0.0120x}$ ,<br>$R^2 = 0.934$ | $-180.84+118.75e^{-0.0170x}$ ,<br>$R^2 = 0.945$ | $-165.19+102.85e^{-0.0280x}$ ,<br>$R^2 = 0.949$ |
| 15 | 1 | $-263.15+208.67e^{-0.0073x}$ ,<br>$R^2 = 0.991$ | $-269.24+213.76e^{-0.0141x}$ ,<br>$R^2 = 0.993$ | $-272.09+215.38e^{-0.0206x}$ ,<br>$R^2 = 0.996$ | $-265.06+209.28e^{-0.0299x}$ ,<br>$R^2 = 0.995$ |



|    |   |                                                 |                                                 |                                                 |                                                 |
|----|---|-------------------------------------------------|-------------------------------------------------|-------------------------------------------------|-------------------------------------------------|
|    | 2 | $-277.85+150.52e^{-0.0076x}$ ,<br>$R^2 = 0.975$ | $-276.92+149.57e^{-0.0154x}$ ,<br>$R^2 = 0.983$ | $-290.87+162.38e^{-0.0207x}$ ,<br>$R^2 = 0.986$ | $-283.46+154.95e^{-0.0297x}$ ,<br>$R^2 = 0.984$ |
| 16 | 1 | $-231.29+197.04e^{-0.0071x}$ ,<br>$R^2 = 0.980$ | $-226.50+191.49e^{-0.0148x}$ ,<br>$R^2 = 0.984$ | $-220.39+184.73e^{-0.0239x}$ ,<br>$R^2 = 0.992$ | $-216.85+181.23e^{-0.0331x}$ ,<br>$R^2 = 0.994$ |
|    | 2 | $-285.90+188.51e^{-0.0066x}$ ,<br>$R^2 = 0.982$ | $-289.35+191.23e^{-0.0130x}$ ,<br>$R^2 = 0.985$ | $-290.93+191.83e^{-0.0191x}$ ,<br>$R^2 = 0.990$ | $-303.52+204.49e^{-0.0243x}$ ,<br>$R^2 = 0.989$ |
| 17 | 1 | $-148.78+104.78e^{-0.0105x}$ ,<br>$R^2 = 0.984$ | $-147.34+103.47e^{-0.0217x}$ ,<br>$R^2 = 0.990$ | $-146.58+101.90e^{-0.0326x}$ ,<br>$R^2 = 0.995$ | $-145.69+101.16e^{-0.0456x}$ ,<br>$R^2 = 0.994$ |
|    | 2 | $-160.30+76.82e^{-0.0141x}$ ,<br>$R^2 = 0.963$  | $-163.89+79.30e^{-0.0252x}$ ,<br>$R^2 = 0.985$  | $-167.10+81.42e^{-0.0356x}$ ,<br>$R^2 = 0.990$  | $-165.42+80.02e^{-0.0494x}$ ,<br>$R^2 = 0.995$  |
| 18 | 1 | $-281.04+251.13e^{-0.0087x}$ ,<br>$R^2 = 0.937$ | $-302.25+271.76e^{-0.0153x}$ ,<br>$R^2 = 0.964$ | $-297.49+268.23e^{-0.0236x}$ ,<br>$R^2 = 0.972$ | $-299.74+268.43e^{-0.0315x}$ ,<br>$R^2 = 0.976$ |
|    | 2 | $-259.03+121.89e^{-0.0131x}$ ,<br>$R^2 = 0.795$ | $-260.63+124.71e^{-0.0241x}$ ,<br>$R^2 = 0.874$ | $-264.33+125.03e^{-0.0347x}$ ,<br>$R^2 = 0.923$ | $-282.21+143.39e^{-0.0370x}$ ,<br>$R^2 = 0.941$ |
| 19 | 1 | $-150.14+95.90e^{-0.0121x}$ ,<br>$R^2 = 0.995$  | $-149.64+95.25e^{-0.0248x}$ ,<br>$R^2 = 0.997$  | $-151.90+96.62e^{-0.0359x}$ ,<br>$R^2 = 0.998$  | $-150.46+94.91e^{-0.0496x}$ ,<br>$R^2 = 0.998$  |
|    | 2 | $-164.44+66.41e^{-0.0111x}$ ,<br>$R^2 = 0.990$  | $-162.54+64.40e^{-0.0237x}$ ,<br>$R^2 = 0.993$  | $-163.04+64.63e^{-0.0358x}$ ,<br>$R^2 = 0.995$  | $-167.04+67.84e^{-0.0434x}$ ,<br>$R^2 = 0.994$  |
| 20 | 1 | $-149.23+84.98e^{-0.0121x}$ ,<br>$R^2 = 0.984$  | $-149.81+85.21e^{-0.0241x}$ ,<br>$R^2 = 0.990$  | $-148.65+84.37e^{-0.0375x}$ ,<br>$R^2 = 0.994$  | $-150.82+85.10e^{-0.0484x}$ ,<br>$R^2 = 0.994$  |
|    | 2 | $-167.33+70.24e^{-0.0100x}$ ,<br>$R^2 = 0.940$  | $-168.96+72.29e^{-0.0197x}$ ,<br>$R^2 = 0.956$  | $-166.62+69.35e^{-0.0308x}$ ,<br>$R^2 = 0.973$  | $-167.00+70.16e^{-0.0424x}$ ,<br>$R^2 = 0.970$  |
